## RESEARCH ARTICLE

# Estimating individual exposure to predation risk in group-living baboons, *Papio anubis*

Alexandre Suire<sup>1</sup>, Itsuki Kunita<sup>2</sup>, Roi Harel<sup>3,4</sup>, Margaret Crofoot<sup>3,4</sup>, Mathew Mutinda<sup>5</sup>, Maureen Kamau<sup>6,7</sup>, James M. Hassel<sup>6</sup>, Suzan Murray<sup>6</sup>, Shoji Kawamura<sup>8</sup>, Akiko Matsumoto-Oda<sup>9</sup> \*

**1** Faculty of Global and Regional Studies, University of the Ryukyus, Okinawa, Japan, **2** Faculty of Engineering, University of the Ryukyus, Okinawa, Japan, **3** Department for the Ecology of Animal Societies, Max Planck Institute of Animal Behavior, Konstanz, Germany, **4** Department of Biology, University of Konstanz, Konstanz, Germany, **5** Kenya Wildlife Service, Nairobi, Kenya, **6** Smithsonian Conservation Biology Institute, Global Health Program, Washington, DC, United States of America, **7** Mpala Research Centre, Nanyuki, Kenya, **8** Graduate School of Frontier Sciences, The University of Tokyo, Chiba, Japan, **9** Graduate School of Tourism Sciences, University of the Ryukyus, Okinawa, Japan

✉ These authors contributed equally to this work.

\* [a\\_matsu@grs.u-ryukyu.ac.jp](mailto:a_matsu@grs.u-ryukyu.ac.jp)

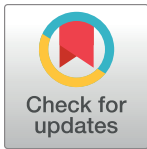

## OPEN ACCESS

**Citation:** Suire A, Kunita I, Harel R, Crofoot M, Mutinda M, Kamau M, et al. (2023) Estimating individual exposure to predation risk in group-living baboons, *Papio anubis*. PLoS ONE 18(11): e0287357. <https://doi.org/10.1371/journal.pone.0287357>

**Editor:** Rachael Miller (Harrison), Anglia Ruskin University, UNITED KINGDOM

**Received:** June 4, 2023

**Accepted:** October 16, 2023

**Published:** November 8, 2023

**Copyright:** © 2023 Suire et al. This is an open access article distributed under the terms of the [Creative Commons Attribution License](https://creativecommons.org/licenses/by/4.0/), which permits unrestricted use, distribution, and reproduction in any medium, provided the original author and source are credited.

**Data Availability Statement:** All relevant data are within the paper and its [Supporting Information](#) files.

**Funding:** This work was supported by JSPS KAKENHI Grant Number JP19H03312 to AMO and AS. MCC and RH were supported by an NSF grant (IIS 1514174). MCC received additional support from a Packard Foundation Fellowship (2016-65130), and the Alexander von Humboldt Foundation in the framework of the Alexander von Humboldt Professorship endowed by the Federal

## Abstract

In environments with multiple predators, vulnerabilities associated with the spatial positions of group-living prey are non-uniform and depend on the hunting styles of the predators. Theoretically, coursing predators follow their prey over long distances and attack open areas, exposing individuals at the edge of the group to predation risk more than those at the center (marginal predation). In contrast, ambush predators lurk unnoticed by their prey and appear randomly anywhere in the group; therefore, isolated individuals in the group would be more vulnerable to predators. These positions of vulnerability to predation are expected to be taken by larger-bodied males. Moreover, dominant males presumably occupy the center of the safe group. However, identifying individuals at higher predation risk requires both simultaneous recording of predator location and direct observation of predation events; empirical observations leave ambiguity as to who is at risk. Instead, several theoretical methods (predation risk proxies) have been proposed to assess predation risk: (1) the size of the individual 'unlimited domain of danger' based on Voronoi tessellation, (2) the size of the 'limited domain of danger' based on predator detection distance, (3) peripheral/center position in the group (minimum convex polygon), (4) the number and direction of others in the vicinity (surroundedness), and (5) dyadic distances. We explored the age-sex distribution of individuals in at-risk positions within a wild baboon group facing predation risk from leopards, lions, and hyenas, using Global Positioning System collars. Our analysis of the location data from 26 baboons revealed that adult males were consistently isolated at the edge of the group in all predation risk proxies. Empirical evidence from previous studies indicates that adult male baboons are the most frequently preyed upon, and our results highlights the importance of spatial positioning in this.

Ministry of Education and Research. Support was also provided by the Center for the Advanced Study of Collective Behavior at the University of Konstanz, DFG Centre of Excellence 2117 (ID: 600 422037984). We also acknowledge funding from the Max Planck Institute of Animal Behavior and the University of California, Davis.

## Introduction

Animals are often tightly grouped under the threat of predation, with all group members benefiting from reduced predation risk through several mechanisms, including dilution, many-eyes, and confusion effects [1,2]. However, predation risk is often unequal among individuals with different attributes and states within a group. For example, predators may select prey based on their individual vulnerabilities [3–5] to conserve hunting energy or reduce the risk of injury by selecting prey in poor conditions [6–8]. In many taxa, predators disproportionately select young, old, sick, weak, injured, or inexperienced individuals from prey populations [4,9,10].

Spatial positions within the prey group have also been associated with vulnerability to predation [11–13]. Many studies on wild primates have employed the individual identification method, thus contributing to empirical knowledge that different individuals occupy distinct positions within a group. Briefly, individuals that occupy the center of a group may be either dominant [14,15], highly sociable [16], stay longer in the group [17], or female and immature [18,19]. Males can be located in front of the group while travelling, where the risk of encountering predators is high [15,20–22]. However, opposite patterns have been reported in other animals, including primates, where the predation risk is highest in the center [23,24] or rear of the group [21,25,26].

One possible reason for the empirical ambiguity may be related to data collection methods. In previous studies, the spatial positions of individuals were obtained by recording the order in which animals passed through anchor points, such as roads, or by measuring individual distances from the anchor using foot observers. However, individual primates have recently been reported to exhibit varying degrees of intolerance to predator as well as human observer approaches [27]. Specifically, shy individuals tend to avoid human observers, creating a bias in the spatial positioning data. Hunted individuals may have been observed under these conditions. Global Positioning Systems (GPS) can effectively avoid this problem by recording individual positions even in the absence of human observers.

Another reason for the empirical ambiguity with respect to predation risk could be predator hunting styles, which are generally divided into coursing and ambushing. Because coursing predators (primarily canids and hyenas) chase their prey over long distances and attack from open areas, individuals at the edge of a group are more likely to encounter predators than individuals at the center and are thus more vulnerable ('marginal predation', Table 1) [12,28]. In contrast, ambush predators (mainly felines) approach their prey unnoticed and randomly appear anywhere in the group; therefore, the predation risk is higher for isolated individuals [29–32]. This indicates that individuals vulnerable to one type of predator may not be as vulnerable to another type of predator. Most studies on predator-prey responses have focused on only one of multiple predator species in an ecosystem [33,34]. Studies that account for the risk of multiple predators should derive a general rule regarding positions vulnerable to predation.

In this study, we used multiple GPS devices simultaneously on a group of individually identified wild baboons to re-examine the age, sex, and dominance of individuals in positions considered vulnerable to each of the two hunting styles of terrestrial predators, under conditions that minimized the influence of human observers. Depending on food dispersal, predation pressure, and group size within the environment, the spread of animal groups varies, even within conspecific species [35]. In general, as long-lived and highly social mammals, primates form lasting social bonds and maintain cohesive social groups. Baboons in the wild reportedly prefer four to six specific neighbors [36]. Although the sample size of predation events was small, a previous study reported that predators were more likely to hunt adults than juveniles and males than females [37]. Instead of directly observing predation events, we calculated the individual predation risk using five alternative indices (proxies) that theoretical studies have

**Table 1. Summary of advantages and weaknesses of each predation risk proxy, and suggested cases of when to use each depending on the predator's preferences.**

| Proxy                             | Predator's preference                                                                 | Advantages                                                                                                                                                                                                    | Weaknesses                                                                                                                                                                                                                                     | References |
|-----------------------------------|---------------------------------------------------------------------------------------|---------------------------------------------------------------------------------------------------------------------------------------------------------------------------------------------------------------|------------------------------------------------------------------------------------------------------------------------------------------------------------------------------------------------------------------------------------------------|------------|
| Unlimited domain of danger (UDOD) | Predators attack the edge of the group (one or several individuals)                   | <ul style="list-style-type: none"> <li>• Simple "edge" vs. "central" individual definition</li> </ul>                                                                                                         | <ul style="list-style-type: none"> <li>• Infinite areas are ecologically unrealistic</li> <li>• Possibly unrealistic measure of predation perception</li> <li>• Distances to and locations of neighbors are unknown</li> </ul>                 | 29         |
| Minimum convex polygon (MCP)      | Predators attack the strict boundary of the group                                     | <ul style="list-style-type: none"> <li>• Strict "boundary" vs. "inside" definition</li> </ul>                                                                                                                 | <ul style="list-style-type: none"> <li>• Distances and locations of neighbors are unknown</li> </ul>                                                                                                                                           | 39, 40     |
| Limited domain of danger (LDOD)   | Predators attack isolated individuals (less neighbors and more widely spaced to them) | <ul style="list-style-type: none"> <li>• Includes information on the predator's range of attack</li> </ul>                                                                                                    | <ul style="list-style-type: none"> <li>• Difficulty in defining the radius</li> <li>• Possibly unrealistic measure of predation perception</li> <li>• Limited information on the number of neighbors and their closeness (distance)</li> </ul> | 42         |
| Surrundedness                     | Predators attack isolated individuals (less surrounded by neighbors)                  | <ul style="list-style-type: none"> <li>• Includes information on the position and direction of all other group members</li> <li>• More fine-scale measure of spatial centrality (vs. UDOD and MCP)</li> </ul> | <ul style="list-style-type: none"> <li>• Distance to neighbors unknown</li> </ul>                                                                                                                                                              | 47         |
| Dyadic distances                  | Predators attack isolated individual (more widely spaced to neighbors)                | <ul style="list-style-type: none"> <li>• Includes information on the distances to all other group members</li> </ul>                                                                                          | <ul style="list-style-type: none"> <li>• Location (direction) of neighbors are unknown</li> </ul>                                                                                                                                              | 32         |

<https://doi.org/10.1371/journal.pone.0287357.t001>

proposed to predict the predation risk faced by individual prey in two-dimensional space. We tested the following three hypotheses. Hypothesis 1 was that adult males are located peripherally, where coursing predation is most likely to occur. Hypothesis 2 was that isolated individuals vulnerable to ambush predators are adult males. Hypothesis 3 was that dominant individuals, especially the alpha male, occupy the center of the group.

## Methods

### Study site and subjects

This study was conducted at the Mpala Research Centre (0° 20'N, 36° 50'E) on Laikipia Plateau, Kenya from July 19 to August 18, 2019. The surrounding environment included bushes and riverine woodlands dominated by *Acacia* spp. The annual rainfall at Mpala is approximately 700 mm, with trilateral peaks in April–May, October–November, and July–August [38]. The rainfall was highly variable in each year, and only approximately half (37 mm) of the normal rainfall (56 mm, 1998–2018) occurred in July 2019, which resulted in good visibility for observers.

The wild anubis baboon (*Papio anubis*) 'AI' group has been studied since 2011. During the study period, the group of 63 individuals, including infants, comprised 8 adult males and 16 adult females. During the study period, excluding the first five days, we recorded behaviors via *ad-libitum* observation, and the alpha male was determined through direct behavioral observations, such as attacks or displacements of other individuals in the group. Genetic analysis by long term data showed that the alpha male in the study period, MG, was born in this group. Leopards, lions, and hyenas were sympatric with the AI group. The predation rate on the AI group from 2011 to 2016 was estimated at 0.06 individual/year [39].

### Collaring methods and GPS-recorded data

Baboons were captured using walk-in traps (1.8 m<sup>3</sup>) baited with maize and placed near the sleeping sites of the groups. Baboons were not fed except during capture. Two criteria were

used for capture. First, a GPS weight limit of no more than 3% body weight was adopted. As a result, 29 infants (46.03% of the AI group) were excluded from the study. Second, we excluded pregnant and lactating females and older individuals to avoid adverse health effects of capture and anesthesia. Individuals were chemically immobilized using ketamine (15 mg/kg) and fitted with GPS loggers (e-Obs Digital Telemetry, Gruenwald, Germany). The collars were fitted to 5 adult males, 10 adult females, 6 adolescent males, and 5 juveniles (2 males and 3 females). Collared adults accounted for 62.5% of the total adult population. The age class 'juvenile' in this study included both males and females, because there is little sex difference in social development in individuals under four years of age [15]. The collars were equipped with a breakaway mechanism (Advanced Telemetry Solutions, Isanti, MN, USA), which automatically released them at the end of the study.

We measured the positions of individual baboons using GPS during the day (7:00–18:00) for 30 days from July 19, 2019. Beginning on July 24, the number of tracked individuals decreased as several collars were dropped during the study. The priority of this study was to analyze the spatial positions of the largest number of individuals [40]; thus, we analyzed data from July 19 to 23. For 82.1% (1,119 timestamps) of all 3,305 timestamps (calculated as 60 min x 11 h x 5 days), the positions of  $\geq 25$  individuals were measured simultaneously.

The presence of estrous females may affect the spatial position of males because males stay in close proximity to those females. We recorded female estrous status every morning and evening at the sleeping sites. The number of estrous females during the analysis period was  $1.80 \pm 1.70$  (mean  $\pm$  SD), which was not significantly different from the value ( $1.62 \pm 0.95$ ) recorded in the remainder of the study period (*t*-test,  $t = -0.30$ ,  $n_1 = 5$ ,  $n_2 = 34$ ,  $p = 0.78$ ).

## Group spread

At each timestamp, the linear distance between two individuals with GPS in a group was calculated for all combinations; the maximum linear distance between two individuals at a single timestamp was considered the group spread at that time.

## Predation risk proxies

Theoretical studies have proposed several proxies to predict the predation risk at different spatial positions (Table 1 and Fig 1). We used the unlimited domain of danger (UDOD) and minimum convex polygon (MCP) to assess the predation risk for individuals at the edge of the group, where they are most likely to encounter predators (Fig 1A and 1B). The extent to which an individual was surrounded by others was then analyzed using the limited domain of danger (LDOD), surroundedness, and dyadic distances (Fig 1C–1E). The details of each proxy are presented below.

**a. UDOD.** Hamilton [29] proposed the domain of danger (DOD) concept as a measure of the predation risk taken by each prey individual within a group. This concept assumes that a predator currently undetected by prey might appear anywhere within the field, inside or outside the group. DOD is defined as the space around the individual within which a predator can attack and kill it; the larger its size, the higher the individual expected predation risk. The predator is assumed to attack individuals at the closest distance (Table 1). When a perpendicular bisector is drawn on a line connecting points (mother points) placed at arbitrary neighboring positions, the nearest neighbor region formed around each mother point is known as a Voronoi cell. A general problem arises when applying Hamilton's idea to real animal groups: DOD is defined as a Voronoi cell, but simultaneously, individuals at the edge of the group have biologically unrealistic unbounded Voronoi polygons (UDOD) (Fig 1A).

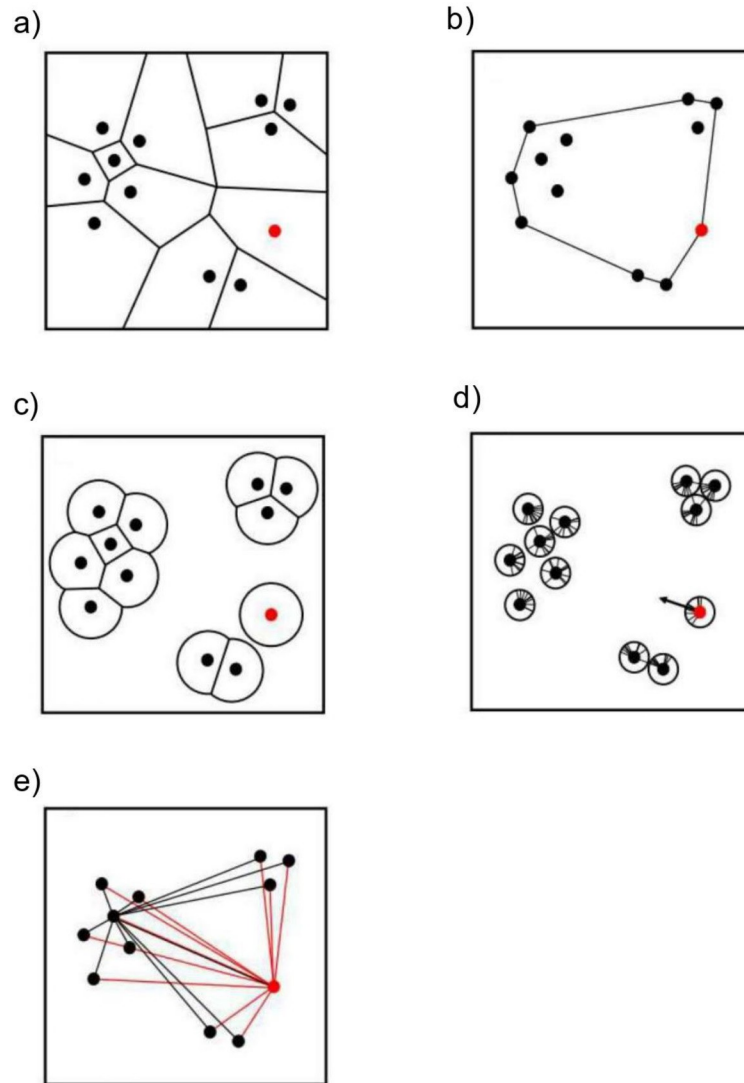

**Fig 1. Schematic of each predatory risk proxy.** The points represent individuals. a) unlimited domain of danger (UDOD); b) positions based on a minimum convex polygon (MCP); c) limited domain of danger (LDOD); d) surroundedness (circular variance); e) dyadic distances. Points are individuals. If the red point is infinite in the UDOD or on the boundary in the MCP, it is the most vulnerable individual compared with its group mates. Similarly, if the size of the LDOD is maximal, the surroundedness is high, or the dyadic distance is large (the black line is the dyadic distance), the individual in red is the most vulnerable compared to its group mates.

<https://doi.org/10.1371/journal.pone.0287357.g001>

**b. MCP.** Predation risk is higher for individuals at the edge of a group than for those at the center [41]. One strategy to determine the individuals occupying these positions is based on a MCP. In this method, animals were defined as being at the edge (boundary) of the group if they belonged to the set of vertices describing the smallest convex polygon enclosing all members of the group (Fig 1B) [42]. Consequently, all other individuals were defined as being inside the group.

**c. LDOD.** Applying Hamilton's idea to real animal groups raises the problem that the DODs of edge individuals are infinite, which is a biologically unrealistic assumption [43]. Therefore, subsequent theoretical studies have propounded an alternative proxy known as LDOD [44]. The LDOD is the area of a circle of radius  $r$  centered on each animal. This radius

corresponds to the range over which a predator can strike, the maximum detection distance of the predator, or the distance within which the predator can successfully launch an attack after approaching undetected [44]. The LDOD of an isolated focal individual is maximal, defined as  $\pi r^2$ , where  $r$  is the predator's attack distance (Fig 1C). If there is a conspecific individual within the maximum LDOD, the distance between the two is less than  $2r$ , and the created bisector reduces the LDOD.

The definition of  $r$  based on field reports is important to represent the most realistic range of danger. Information on the attack ranges of the main ambush predators of baboons, leopards, and lions is scarce in the literature, as only two studies can be cited. Observations by Bailey [45] suggest that prey will allow visible leopards to approach up to 25 m without feeling threatened, but it will flee if they are closer than 10 m. Specifically, the distance limit of 10–25 m allows the leopard to hide and stay undetected by a baboon; therefore, 25 m was chosen for this study. Because anubis baboons also suffer from lion predation, we also calculated LDODs with a radius of 70 m based on the study by Cowlshaw [46] on chacma baboons (*Papio ursinus*) and their use of refugia against lions and leopards. The 70-m value is the median distance to a refuge, where chacma baboons living in open plains spend most of their time. This is the hypothesized distance beyond which a baboon is outrun and captured by a predator before reaching safety. Empirically, Stander [47] reported that 73% of lion kills had short chase distances of less than 20 m, whereas the remaining 27% were between 20–150 m. Moreover, Scheel [48] reported hunting distances of up to 200 m. In this study, individual LDODs can theoretically vary between a minimum of 0 m<sup>2</sup> (if at least two individuals share the same location) and a maximum of 1,960 and 15,369 m<sup>2</sup> (the individual is isolated), with radii of 25 and 70 m, respectively.

**d. Surroundedness.** 'Surroundedness' refers to the degree to which an individual is surrounded by all group members, with the expectation that more surrounded individuals are less vulnerable to predation. This study assessed surroundedness using circular variance, a measure based on circular statistics [49].

The following calculations were performed according to Cremers and Klugkist [50]. A unit was drawn around a focal individual, and the directions of all group members were projected as points on the circle's circumference. Connecting these points to the origin (the focal individual) yielded individual vectors (Fig 1D). Vectors with the same value were stacked in the radial direction of the base circle. The resulting vector (R) was created by connecting the toe of the first vector to the head of the last vector. Relative to the focal individual, the direction indicated where most other group members belonged.

In this study, we calculated circumpolar variance, defined as  $1 - \bar{R}$ . The length of the mean resultant vector ( $\bar{R}$ ) is R divided by the number of created vectors. A variance of 1 means that the individual is surrounded by many individuals, whereas a variance of 0 means that the individual is not surrounded; that is, all other members are located in one particular direction.

**e. Dyadic distances.** Predation risk will likely vary with the number and proximity of conspecifics through effects such as dilution and accelerated predator detection [32]. Thus, one way to determine which individuals are more susceptible to predation is to determine their distance from all members. Individuals that maintain a greater distance from others are more physically isolated (Fig 1E) and thus may be the preferred target for predators. Therefore, we calculated the Euclidean distance for each focal individual and the dyadic combination of all other group members at each timestamp.

## Statistical analyses

We aimed to explore the potential differences among age-sex classes for all predation risk proxies. Because LDODs and surroundedness are continuous variables, we used linear mixed models (LMMs). The autocorrelation structure of the measured sample points was analyzed, and the data were fitted using a Gaussian model with the following equation:

$$\text{Semi-variance}(\tau) = c [1 - \exp(-\tau^2/a^2)],$$

where  $c$ ,  $a$ , and  $\tau$  represent sill, range, and time-lag (min), respectively. These calculations were conducted at each timestamp (every 1 min interval) using the Python 3 (version 3.7.10) libraries NumPy (version 1.20.2), Pandas (version 1.3.5), and Matplotlib (version 3.3.4). We set these variables as the response variables, with age-sex classes (factors with four levels: adult males, adult females, adolescent males, and juveniles) as predictors. The interaction term between age and sex was also included. Because both the UDODs and MCP positions are binomial factors, we used generalized linear mixed models (GLMMs). Both models were fitted using a binomial error structure, with the individual spatial position as the response variable. The UDOD was defined as finite UDOD [0] vs. infinite UDOD [1], and the MCP positions were inside [0] vs. boundary [1]. The predictors were similar to those of the LMMs. To study the differences in dyadic distances between each age-sex class, we used an LMM with dyadic distances as the response variable and pairs of age-sex classes (factors with ten levels) as the predictor. A two-sided test was used to ascertain the differences in mean values for each age-sex group. All LMMs and GLMMs were followed by Tukey's post-hoc comparisons with Bonferroni correction to assess the specific differences between each age-sex class.

In all models, individual identities were set as random factors on the intercept. The significance of predictors in each model was computed with the model including the predictor against the model excluding the predictor (Wald  $\chi^2$  for LMMs and likelihood-ratio  $\chi^2$  tests for GLMMs, Anova Type III). Marginal  $R^2$  and conditional  $R^2$  were given for each model, representing the variance explained only by fixed effects and the variance explained by fixed and random effects, respectively. Results were considered significant at the  $\alpha = 0.05$  level for the models and post-hoc comparisons.

R packages {version 4.1.1; R Core Team [51]} used for the analyses were 'lme4' for running the LMMs and GLMMs, 'multcomp' for the post-hoc analyses, 'car' for ANOVA tables, and 'MuMin' for  $R^2$  computation.

## Results

### Group spread

The median group spread across all timestamps was 205.18 m (136.20 m in the first quartile and 345.18 m in the third quartile). The maximum and minimum distances were 3,560.79 and 20.89 m, respectively.

### Risk of exposure to predation

**a. UDODs.** Infinite UDODs were most common among adult males, followed by adult females, adolescent males, and juveniles (Fig 2A and S1 Table). Significant differences were observed in the percentage of finite UDODs among the age-sex classes ( $\chi^2 = 50.40$ ,  $p < 0.001$ ). Adult males had the smallest proportion of finite UDODs (vs. adult females,  $z = 4.63$ ,  $p < 0.001$ , vs. adolescent males,  $z = 5.87$ ,  $p < 0.001$ , vs. juveniles,  $z = 6.33$ ,  $p < 0.001$ ). No significant differences were observed in any other comparisons.

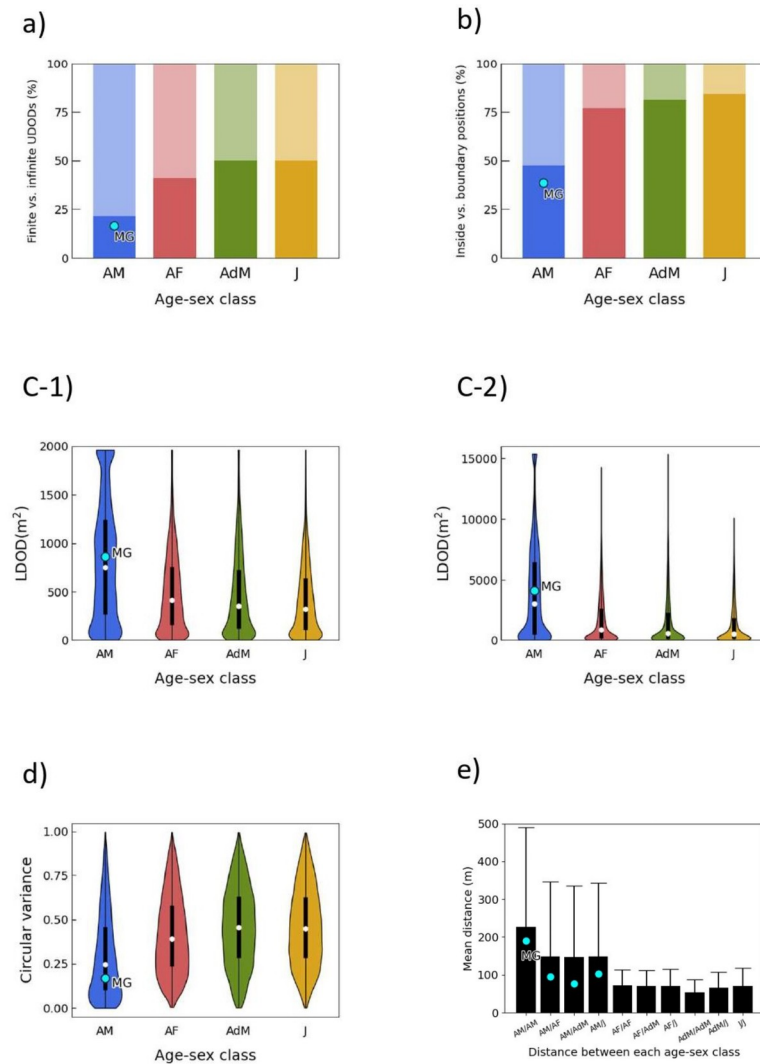

**Fig 2. Calculated results for each predation risk proxy.** a) Percentages of finite (dark gray) vs. infinite (light gray) UDODs for each age-sex class, ordered from lowest to highest. Age-sex class abbreviations are as follows: AM = adult males, AF = adult females, AdM = adolescent males, and J = juveniles. Notation is similar in subsequent figures. b) Percentages of the inside (dark gray) vs. boundary (light gray) MCP positions for each age-sex class. c-1, c-2) Violin plots along boxplots of LDODs. c-1) radius of 25 m and c-2) radius of 70 m.  $\circ$  denotes the mean value and  $\bullet$  denotes the alpha male value. d) Violin plots along boxplots of surroundedness. e) Mean distance (m) between each age-sex class. Bars are mean associated with their standard error.

<https://doi.org/10.1371/journal.pone.0287357.g002>

**b. MCP.** Significant differences were observed in the percentage of individuals at the edge/center among the age-sex classes ( $\chi^2 = 83.52$ ,  $p < 0.001$ , Fig 2B and S2 Table). Adult males were more frequently on the edge than individuals of other age-sex classes (vs. adult females,  $z = 7.36$ ,  $p < 0.001$ , vs. adolescent males,  $z = 6.86$ ,  $p < 0.001$ , vs. juveniles,  $z = 8.04$ ,  $p < 0.001$ ). No significant differences were observed in any other comparisons.

**c. LDODs.** There were differences among the age-sex classes for both LDODs with radii of 25 m (attack of a leopard) and 70 m (attack of a lion; Fig 2C). For LDODs with a radius of 25 m, the percentages of finite LDODs among the four age-sex groups significantly differed ( $\chi^2 = 606.76$ ,  $p < 0.001$ , S3 Table). Adult males had the largest LDODs (vs. adult females,



$z = 18.67, p < 0.001$ , vs. adolescent males,  $z = 19.75, p < 0.001$ , vs. juveniles,  $z = 22.36, p < 0.001$ ). Similar qualitative differences were found for the 70-m radius LDODs ( $\chi^2 = 41.93, p < 0.001$ , vs. adult females,  $z = 4.94, p < 0.001$ , vs. adolescent males,  $z = 5.22, p < .001$ , vs. juveniles,  $z = 3.91, p < 0.001$ ). No differences were found at either 25 or 70 m in any of the other comparisons.

**d. Surroundedness.** The degree of surroundedness by group members showed significant differences among the age-sex classes ( $\chi^2 = 343.16, p < 0.001$ , Fig 2D and S4 Table). Adult males had the smallest circle variances (vs. adult females,  $t = 13.86, p < 0.001$ , vs. adolescent males,  $t = -16.16, p < 0.001$ , vs. juveniles,  $t = -15.80, p < 0.001$ ). No significant differences were observed in any other comparisons.

**e. Dyadic distances.** Of all age-sex classes, the mean distance between adult males was the greatest, and that between adolescent males was the smallest (Fig 2E). Distances between adult males (mean  $\pm$  SE,  $226.38 \pm 263.38$  m) were significantly longer than those between adult females ( $71.45 \pm 42.01$  m,  $z = 3.31, p < 0.005$ , S5 Table) or those between adolescent males ( $53.66 \pm 33.98, z = 3.30, p < 0.005$ ). However, no significant differences were found for the distance between adult males and that between juveniles ( $70.83 \pm 46.51, z = 2.73, p > 0.005$ ).

### The special position of the alpha male

The UDOD and MCP results showed that the alpha male, *MG*, was located peripherally to the group to a similar extent as the other males (Fig 2A and 2B). In addition, LDOD, surroundedness, and dyadic distance metrics indicated that *MG* was slightly more spatially isolated than the average for adult males.

## Discussion

In Hypothesis 1, we proposed that adult males are located peripherally, where coursing predation is most likely to occur. Our UDOD and MCP results showed that, as expected, adult males were located more peripherally, consistent with previous studies on primates [52] and other animals [53–55]. Two well-studied hypotheses have been proposed from ecological and sociological perspectives to explain why males are located peripherally. One hypothesis involves a trade-off between increased foraging efficiency and higher predation risk [54,56]. Adult males with larger bodies and higher nutritional requirements may have prioritized greater food accessibility over predation risk and occupied peripheral positions. In addition, adult males may play a role in protecting females and their young in the center of the group through vigilance, alarm, mobbing, and counterattacks against predators or neighboring groups [57]. Four reasons have been cited for this behavior: paternal investment, maintenance of male and female social bonds, group enhancement benefits, and quality signaling in the mating market [58].

Hypothesis 2 states that adult males are the most isolated individuals vulnerable to ambush predators. As expected, the LDOD, surroundedness, and dyadic distance indicated that adult male baboons were the most isolated. One reason for this may be the social structure of baboons. In all four savanna baboon species, anubis, yellow, chacma, and guinea baboons, females remain in their natal groups throughout their lives, whereas males generally move to another group after sexual maturity. In species with male dispersal, adult males are expected to have few or no relatives in the postnatal group except for their offspring. DNA microsatellite association analyses in some primates have reported that adult males have few close relatives in their postnatal groups [59,60]. As unrelated males are severe competitors for females in estrus, adult males maintain a long distance from each other to escape attacks by other males and serious injuries [61].

Hypothesis 3 states that individuals with high social status among adult males, especially alpha males, occupy the secure core of the population. Dominant individuals, who can access preferential foods even under intense competition, are expected to be in the safe center of the group [31,62–64]. However, the alpha male in this study was peripheral and isolated, as were other males. Intimacy in the male-female relationship, known as ‘friendship’ in baboons [65], prevents male isolation, and this relationship forms through the offspring in yellow baboons [66]. One possible explanation for our result may be that the alpha male, although born in this group, had been in this position for only approximately one year and had few female friends and offspring.

We addressed the methodological and theoretical advantages and disadvantages of the proxies used in this study for each predator hunting style. A strong assumption involves variation in predation risk based only on spatial positioning, for which predators can show variable preferences. First, assuming a coursing predator, UDOD and MCP positions are similar in that they use a simple dichotomy to define individuals located on the edge of the group, as opposed to centrally positioned ones. However, both methods vary in their definition of edges owing to their underlying mathematics, which can result in slightly different results. For example, Voronoi diagrams can define more individuals as peripheral (‘edge’ individuals) compared to MCP vertices that only consider peripheral individuals as those strictly forming the spatial boundary of the group; individuals with finite UDODs are always inside the group. These differences in definition are illustrated by the left and top-right clusters of individuals in Fig 1A and 1B, respectively. Use of one proxy will then depend on whether the predator prefers to strictly attack the individual forming the boundary of the group or any individual forming the periphery (‘edge’), including the one at the strict boundary. Both methods are useful only when predators consistently attack the edge of a group (marginal predation). Indeed, this has been observed in different species [29,67–69].

From a theoretical perspective, LDODs are based on the notion that animals react to the open spaces around them, whereas the surroundedness and dyadic distances highlight the possible effects of several neighbors. In a context where predators do not consistently attack peripheral individuals, but choose isolated individuals, i.e., those outside or inside the group who are relatively distant from group members, other variables may be more pertinent. LDODs can be useful, because they include information on the distance to neighbors regardless of the individual position within the group. However, their calculation can be complicated if the group has several types of predators with different hunting techniques. Consequently, this raises the question whether one should expect changes in results when comparing groups of different radii. As such, the radius rests on a detailed description of predator-prey interactions and is somewhat arbitrary.

Considering that LDODs only include information on the closest neighbors, the surroundedness and dyadic distances complement each other and provide a better measure of isolation based on the positions of group members. Surroundedness is a more fine-scale measure of spatial centrality/peripherality within a group (especially compared to UDODs and MCP positions) and includes information on the position and direction of all other group members. Dyadic distances are a more fine-scale measure of neighbor spacing and include information on the distance to all other group members. In some species, such as straggler fish, isolation, rather than the periphery, is correlated with higher predation risk; i.e., isolated individuals outside the school, where centrally positioned members are also more at risk [23]. Similar patterns could be observed for redshanks, where more widely spaced individuals are preferred targets for predators compared to their nearest neighbors [70].

The number of collared individuals is the most limiting factor in emphasizing these predation risk proxies and any other proxies correlated with predation risk. Missing (non-collared)

individuals influence the shape of the Voronoi diagrams and MCPs, change the size of the LDODs, and modify the circular variance and distances between individuals. Because predation risk is always related to all other group members, the location of the maximum number of, if not all, individuals must be as accurate as possible. However, this study prioritized the maximum number of individuals, which has the disadvantage of reducing the number of data days. Farine et al. [30], who conducted similar data collection and analysis, noted that individuals showed a consistent pattern of spatial positioning within the population over many days. However, in the present study, the maximum h-spread of the group was slightly greater than 3 km, which was attributed to an older male lagging behind the group by approximately half a day. Excluding the data from this day, the median and maximum spread distances for the group were 184.83 and 734.11 m, respectively. Because reducing the number of days of analysis by a factor of  $h$  can cause such variation, a methodology must be developed to determine the time interval of positioning suitable for spatial location analysis and the number of valid data days.

Elucidating the costs of predation risk associated with individual spatial positions within a group is important for understanding group formation and maintenance. The current study showed that adult males consistently occupied vulnerable positions to predators that would attack or ambush them from outside or within the group, respectively. Determining whether adult males position themselves on the edge voluntarily or unwillingly is difficult; however, it is an interesting future challenge for both ecological and social research.

## Supporting information

**S1 Table. Summary statistics of USOD.**

(PDF)

**S2 Table. Summary statistics of percentages of boundary positions.**

(PDF)

**S3 Table. Summary statistics of LODO size with radii of 25 m and 70 m.**

(PDF)

**S4 Table. Summary statistics of surroundedness.**

(PDF)

**S5 Table. Summary statistics of mean distance.**

(PDF)

**S1 Data.**

(ZIP)

## Acknowledgments

We thank the National Commission for Science, Technology and Innovation (Kenya), Kenyan Wildlife Service, Institute of Primate Research (MNK, Kenya), and Mpala Research Centre for their permission to conduct this research. We also thank Carter Loftus, Shauhin Alavi, Agrey Masiva, Rebecca Stites, Ellie Milnes, Jenn Yu, Sharon Mulindi, Nashipai Seketeti, Peter Ombewa, Andrea Surmat, Lenareiyu Ltukulen, and Zakayo Parsimey for their assistance in the baboon captures. We also thank Reiji Suzuki and Eiiti Kasuya for their advice in the analysis.

## Author Contributions

**Conceptualization:** Alexandre Suire, Akiko Matsumoto-Oda.

**Data curation:** Roi Harel, Margaret Crofoot.

**Formal analysis:** Alexandre Suire, Itsuki Kunita.

**Funding acquisition:** Margaret Crofoot, Akiko Matsumoto-Oda.

**Investigation:** Roi Harel, Mathew Mutinda, Maureen Kamau, James M. Hassel, Suzan Murray, Shoji Kawamura, Akiko Matsumoto-Oda.

**Methodology:** Alexandre Suire, Itsuki Kunita.

**Project administration:** Roi Harel, Margaret Crofoot, Akiko Matsumoto-Oda.

**Supervision:** Akiko Matsumoto-Oda.

**Validation:** Alexandre Suire, Itsuki Kunita, Roi Harel, Margaret Crofoot, Mathew Mutinda, Maureen Kamau, James M. Hassel, Suzan Murray, Shoji Kawamura, Akiko Matsumoto-Oda.

**Visualization:** Alexandre Suire, Akiko Matsumoto-Oda.

**Writing – original draft:** Alexandre Suire, Margaret Crofoot, Akiko Matsumoto-Oda.

**Writing – review & editing:** Alexandre Suire, Itsuki Kunita, Roi Harel, Margaret Crofoot, Mathew Mutinda, Maureen Kamau, James M. Hassel, Suzan Murray, Shoji Kawamura, Akiko Matsumoto-Oda.

## References

1. Powell GVN. Experimental analysis of the social value of flocking by starlings (*Sturnus vulgaris*) in relation to predation and foraging. *Anim Behav.* 1974; 22: 501–505. [https://doi.org/10.1016/S0003-3472\(74\)80049-7](https://doi.org/10.1016/S0003-3472(74)80049-7)
2. Caro T. Antipredator Defenses in Birds and Mammals. Chicago: University of Chicago Press; 2005.
3. Emlen JM. The Role of Time and Energy in Food Preference. *Am Nat.* 1966; 100: 611–617. <https://doi.org/10.1086/282455>
4. Curio E. Introduction. *The Ethology of Predation. Zoophysiology and Ecology*, vol 7. Heidelberg: Springer, Berlin,. 1976. pp. 1–4. [https://doi.org/10.1007/978-3-642-81028-2\\_1](https://doi.org/10.1007/978-3-642-81028-2_1).
5. Temple SA. Do predators always capture substandard individuals disproportionately from prey populations? *Ecology.* 1987; 68: 669–674. <https://doi.org/10.2307/1938472>
6. Mech LD. *The Wolf: The Ecology and Behavior of an Endangered Species.* Natural History Press; 1970. Available: <https://play.google.com/store/books/details?id=BDiuwgEACAAJ>.
7. Ackerman BB, Lindzey FG, Hemker TP. Cougar Food Habits in Southern Utah. *J Wildl Manage.* 1984; 48: 147–155. <https://doi.org/10.2307/3808462>
8. Pierce BM, Bleich VC, Bowyer RT. Selection of Mule Deer by Mountain Lions and Coyotes: Effects of Hunting Style, Body Size, and Reproductive Status. *J Mammal.* 2000; 81: 462–472. [https://doi.org/10.1644/1545-1542\(2000\)081<0462:SOMDBM>2.0.CO;2](https://doi.org/10.1644/1545-1542(2000)081<0462:SOMDBM>2.0.CO;2).
9. Errington PL. Predation and Vertebrate Populations. *Quart Rev Biol.* 1946. pp. 144–177. <https://doi.org/10.1086/395220>
10. Krumm CE, Conner MM, Hobbs NT, Hunter DO, Miller MW. Mountain lions prey selectively on prion-infected mule deer. *Biol Lett.* 2010; 6: 209–211. <https://doi.org/10.1098/rsbl.2009.0742> PMID: 19864271
11. Ward A, Webster M. *Sociality: The Behaviour of Group-Living Animals.* Springer International Publishing; 2016. <https://doi.org/10.1007/978-3-319-28585-6>
12. Stankowich T. Marginal predation methodologies and the importance of predator preferences. *Anim Behav.* 2003; 66: 589–599. <https://doi.org/10.1006/anbe.2003.2232>
13. Jolles JW, Sosna MMG, Mazué GPF, Twomey CR, Bak-Coleman J, Rubenstein DI, et al. Both prey and predator features predict the individual predation risk and survival of schooling prey. *Elife.* 2022; 11. <https://doi.org/10.7554/eLife.76344> PMID: 35852826
14. Dostie MJ, Lusseau D, Bonnell T, Clarke PMR, Chaplin G, Kienzle S, et al. Proof of principle: the adaptive geometry of social foragers. *Anim Behav.* 2016; 119: 173–178. <https://doi.org/10.1016/j.anbehav.2016.07.011>

15. Rhine RJ. The order of movement of yellow baboons (*Papio cynocephalus*). *Folia Primatol.* 1975; 23: 72–104. <https://doi.org/10.1159/000155662> PMID: 1140751
16. Josephs N, Bonnell T, Dostie M, Barrett L, Henzi SP. Working the crowd: sociable vervets benefit by reducing exposure to risk. *Behav Ecol.* 2016; 27: 988–994. <https://doi.org/10.1093/beheco/arw003>
17. Busse CD. Spatial structure of chacma baboon groups. *Int J Primatol.* 1984; 5: 247–261. <https://doi.org/10.1007/bf02735760>
18. Heesen M, Macdonald S, Ostner J, Schülke O. Ecological and social determinants of group cohesiveness and within-group spatial position in wild Assamese macaques. *Ethology.* 2015; 121: 270–283. <https://doi.org/10.1111/eth.12336>
19. Schmitt CA, Di Fiore A. Brief communication: Predation risk sensitivity and the spatial organization of primate groups: A case study using GIS in lowland woolly monkeys (*Lagothrix lagotricha poeppigii*). *Am J Phys Anthropol.* 2015; 156: 158–165. <https://doi.org/10.1002/ajpa.22612> PMID: 25209572
20. Harding RSO. Patterns of movement in open country baboons. *Am J Phys Anthropol.* 1977; 47: 349–353. <https://doi.org/10.1002/ajpa.1330470215>
21. Collins DA. Spatial pattern in a troop of yellow baboons (*Papio cynocephalus*) in Tanzania. *Anim Behav.* 1984; 32: 536–553. [https://doi.org/10.1016/S0003-3472\(84\)80292-4](https://doi.org/10.1016/S0003-3472(84)80292-4)
22. King AJ, Douglas CMS, Huchard E, Isaac NJB, Cowlshaw G. Dominance and affiliation mediate despotism in a social primate. *Curr Biol.* 2008; 18: 1833–1838. <https://doi.org/10.1016/j.cub.2008.10.048> PMID: 19026539
23. Parrish JK. Re-examining the selfish herd: are central fish safer? *Anim Behav.* 1989; 38: 1048–1053. [https://doi.org/10.1016/S0003-3472\(89\)80143-5](https://doi.org/10.1016/S0003-3472(89)80143-5)
24. Brunton DH. Impacts of predators: Center nests are less successful than edge nests in a large nesting colony of least terns. *Condor.* 1997; 99: 372–380. <https://doi.org/10.2307/1369943>
25. Handegard NO, Boswell KM, Ioannou CC, Leblanc SP, Tjøstheim DB, Couzin ID. The dynamics of coordinated group hunting and collective information transfer among schooling prey. *Curr Biol.* 2012; 22: 1213–1217. <https://doi.org/10.1016/j.cub.2012.04.050> PMID: 22683262
26. Krause J, Herbert-Read JE, Seebacher F, Domenici P, Wilson ADM, Marras S, et al. Injury-mediated decrease in locomotor performance increases predation risk in schooling fish. *Philos Trans R Soc Lond B Biol Sci.* 2017; 372. <https://doi.org/10.1098/rstb.2016.0232> PMID: 28673910
27. Allan ATL, White AF, Hill RA. Intolerant baboons avoid observer proximity, creating biased inter-individual association patterns. *Sci Rep.* 2022; 12: 8077. <https://doi.org/10.1038/s41598-022-12312-3> PMID: 35577907
28. Hirsch BT, Morrell LJ. Measuring marginal predation in animal groups. *Behav Ecol.* 2011; 22: 648–656. <https://doi.org/10.1093/beheco/arr026>
29. Hamilton WD. Geometry for the selfish herd. *J Theor Biol.* 1971; 31: 295–311. [https://doi.org/10.1016/0022-5193\(71\)90189-5](https://doi.org/10.1016/0022-5193(71)90189-5) PMID: 5104951
30. Farine DR, Strandburg-Peshkin A, Couzin ID, Berger-Wolf TY, Crofoot MC. Individual variation in local interaction rules can explain emergent patterns of spatial organization in wild baboons. *Proc Biol Sci.* 2017; 284. <https://doi.org/10.1098/rspb.2016.2243> PMID: 28424342
31. Hemelrijk CK. Towards the integration of social dominance and spatial structure. *Anim Behav.* 2000; 59: 1035–1048. <https://doi.org/10.1006/anbe.2000.1400> PMID: 10860531
32. Romenskyy M, Herbert-Read JE, Ioannou CC, Szorkovszky A, Ward AJW, Sumpter DJT. Quantifying the structure and dynamics of fish shoals under predation threat in three dimensions. *Behav Ecol.* 2020; 31: 311–321. <https://doi.org/10.1093/beheco/arz197>
33. Montgomery RA, Moll RJ, Say-Sallaz E, Valeix M, Prugh LR. A tendency to simplify complex systems. *Biol Conserv.* 2019; 233: 1–11. <https://doi.org/10.1016/j.biocon.2019.02.001>
34. Say-Sallaz E, Chamaillé-Jammes S, Fritz H, Valeix M. Non-consumptive effects of predation in large terrestrial mammals: Mapping our knowledge and revealing the tip of the iceberg. *Biol Conserv.* 2019; 235: 36–52. <https://doi.org/10.1016/j.biocon.2019.03.044>
35. Davies NB, Krebs JR, West SA. *An Introduction to Behavioural Ecology.* John Wiley & Sons; 2012. Available: <https://play.google.com/store/books/details?id=sFuUbee4V0EC>.
36. Farine DR, Strandburg-Peshkin A, Berger-Wolf T, Ziebart B, Brugere I, Li J, et al. Both Nearest Neighbours and Long-term Affiliates Predict Individual Locations During Collective Movement in Wild Baboons. *Sci Rep.* 2016; 6: 27704. <https://doi.org/10.1038/srep27704> PMID: 27292778
37. Cowlshaw G. Vulnerability to Predation in Baboon Populations. *Behaviour.* 1994; 131: 293–304. Available: <http://www.jstor.org/stable/4535243>.

38. Rubenstein DR. Spatiotemporal environmental variation, risk aversion, and the evolution of cooperative breeding as a bet-hedging strategy. *Proc Natl Acad Sci USA*. 2011; 108 Suppl 2: 10816–10822. <https://doi.org/10.1073/pnas.1100303108> PMID: 21690415
39. Matsumoto-Oda A, Okamoto K, Takahashi K, Ohira H. Group size effects on inter-blink interval as an indicator of antipredator vigilance in wild baboons. *Sci Rep*. 2018; 8: 10062. <https://doi.org/10.1038/s41598-018-28174-7> PMID: 29968733
40. He P, Klarevas-Irby JA, Papageorgiou D, Christensen C, Strauss ED, Farine DR. A guide to designing GPS-based studies of animal societies. *bioRxiv*. 2022. p. 2022.01.29.478280. <https://doi.org/10.1101/2022.01.29.478280>
41. Roney WL, Walston AR, Watt PJ. Do 3-D predators attack the margins of 2-D selfish herds? *Behav Ecol*. 2008; 19: 74–78. <https://doi.org/10.1093/beheco/arm105>
42. Christman MC, Lewis D. Spatial distribution of dominant animals within a group: comparison of four statistical tests of location. *Anim Behav*. 2005; 70: 73–82. <https://doi.org/10.1016/j.anbehav.2004.09.018>
43. Morton TL, Haefner JW, Nugala V, Decino RD, Mendes L. The Selfish Herd Revisited: Do Simple Movement Rules Reduce Relative Predation Risk? *J Theor Biol*. 1994; 167: 73–79. <https://doi.org/10.1006/jtbi.1994.1051>
44. James R, Bennett PG, Krause J. Geometry for mutualistic and selfish herds: the limited domain of danger. *J Theor Biol*. 2004; 228: 107–113. <https://doi.org/10.1016/j.jtbi.2003.12.005> PMID: 15064086
45. Bailey TN. *The African Leopard: Ecology and Behavior of a Solitary Felid*. Columbia University Press; 1993. <https://doi.org/10.7312/bail90198>
46. Cowlishaw G. Trade-offs between foraging and predation risk determine habitat use in a desert baboon population. *Animal Behaviour*. 1997. pp. 667–686. <https://doi.org/10.1006/anbe.1996.0298>
47. Stander PE. Cooperative hunting in lions: the role of the individual. *Behav Ecol Sociobiol*. 1992; 29: 445–454. <https://doi.org/10.1007/BF00170175>
48. Scheel D. Watching for lions in the grass: the usefulness of scanning and its effects during hunts. *Anim Behav*. 1993; 46: 695–704. <https://doi.org/10.1006/anbe.1993.1246>
49. Jammalamadaka RS, Sengupta A. *Topics in Circular Statistics*, World Scientific Press. 2001.
50. Cremers J, Klugkist I. One Direction? A Tutorial for Circular Data Analysis Using R With Examples in Cognitive Psychology. *Front Psychol*. 2018; 9: 2040. <https://doi.org/10.3389/fpsyg.2018.02040> PMID: 30425670
51. R Core Team. *R: A language and environment for statistical computing*. R Foundation for Statistical Computing. 2021.
52. Teichroeb JA, White MMJ, Chapman CA. Vervet (*Chlorocebus pygerythrus*) Intragroup Spatial Positioning: Dominants Trade-Off Predation Risk for Increased Food Acquisition. *Int J Primatol*. 2015; 36: 154–176. <https://doi.org/10.1007/s10764-015-9818-4>
53. Fitzgibbon CD. Why do hunting cheetahs prefer male gazelles? *Anim Behav*. 1990; 40: 837–845. [https://doi.org/10.1016/S0003-3472\(05\)80984-4](https://doi.org/10.1016/S0003-3472(05)80984-4)
54. Krause J. Differential fitness returns in relation to spatial position in groups. *Biol Rev Camb Philos Soc*. 1994; 69: 187–206. <https://doi.org/10.1111/j.1469-185x.1994.tb01505.x> PMID: 8054444
55. Roney WL. Position preferences within groups: do whirligigs select positions which balance feeding opportunities with predator avoidance? *Behav Ecol Sociobiol*. 1995; 37: 195–200. <https://doi.org/10.1007/BF00176717>
56. Hirsch BT. Costs and benefits of within-group spatial position: a feeding competition model. *Q Rev Biol*. 2007; 82: 9–27. <https://doi.org/10.1086/511657> PMID: 17354992
57. van Schaik CP, van Noordwijk MA. The special role of male *Cebus* monkeys in predation avoidance and its effect on group composition. *Behav Ecol Sociobiol*. 1989; 24: 265–276. <https://doi.org/10.1007/BF00290902>
58. van Schaik CP, Bshary R, Wagner G, Cunha F. Male anti-predation services in primates as costly signaling? A comparative analysis and review. *Ethology*. 2021; 128: 1–14. <https://doi.org/10.1111/eth.13233>
59. Moscovice LR, Heesen M, Di Fiore A, Seyfarth RM, Cheney DL. Paternity alone does not predict long-term investment in juveniles by male baboons. *Behav Ecol Sociobiol*. 2009; 63: 1471–1482. <https://doi.org/10.1007/s00265-009-0781-y> PMID: 19816527
60. De Moor D, Roos C, Ostner J, Schülke O. Bonds of bros and brothers: Kinship and social bonding in postdispersal male macaques. *Mol Ecol*. 2020; 29: 3346–3360. <https://doi.org/10.1111/mec.15560> PMID: 32688434
61. Drews C. Contexts and Patterns of Injuries in Free-Ranging Male Baboons (*Papio Cynocephalus*). *Behaviour*. 1996; 133: 443–474.

62. Barta Z, Flynn R, Giraldeau L-A. Geometry for a selfish foraging group: a genetic algorithm approach. *Proc R Soc Lond B: Biol Sci.* 1997; 264: 1233–1238. <https://doi.org/10.1098/rspb.1997.0170>
63. Hall CL, Fedigan LM. Spatial benefits afforded by high rank in white-faced capuchins. *Anim Behav.* 1997; 53: 1069–1082. <https://doi.org/10.1006/anbe.1996.0392>
64. Evers E, de Vries H, Spruijt BM, Sterck EHM. Better safe than sorry—socio-spatial group structure emerges from individual variation in fleeing, avoidance or velocity in an agent-based model. *PLoS One.* 2011; 6: e26189. <https://doi.org/10.1371/journal.pone.0026189> PMID: 22125595
65. Smuts BB. Sex and friendship in baboons. 1985; 303. Available: <https://psycnet.apa.org/fulltext/1985-98402-000.pdf>.
66. Nguyen N, Van Horn RC, Alberts SC, Altmann J. “Friendships” between new mothers and adult males: adaptive benefits and determinants in wild baboons (*Papio cynocephalus*). *Behav Ecol Sociobiol.* 2009; 63: 1331–1344. <https://doi.org/10.1007/s00265-009-0786-6> PMID: 24146523
67. Krause J, Bumann D, Todt D. Relationship between the position preference and nutritional state of individuals in schools of juvenile roach (*Rutilus rutilus*). *Behav Ecol Sociobiol.* 1992; 30: 177–180. <https://doi.org/10.1007/BF00166700>
68. Viscido SV, Wethey DS. Quantitative analysis of fiddler crab flock movement: evidence for ‘selfish herd’ behaviour. *Anim Behav.* 2002. pp. 735–741. <https://doi.org/10.1006/anbe.2001.1935>
69. De Vos A, O’Riain MJ. Sharks shape the geometry of a selfish seal herd: experimental evidence from seal decoys. *Biol Lett.* 2010; 6: 48–50. <https://doi.org/10.1098/rsbl.2009.0628> PMID: 19793737
70. Quinn JL, Cresswell W. Testing domains of danger in the selfish herd: sparrowhawks target widely spaced redshanks in flocks. *Proc Biol Sci.* 2006; 273: 2521–2526. <https://doi.org/10.1098/rspb.2006.3612> PMID: 16959644
